# Supplementary material
Source: PubMed Central journal article supplement (PMC5586003)

# Supplementary Data

## Supplementary Appendix 1. Self-Assessment Questions

---

Rate your level of agreement with the following questions from 0 (low/disagree strongly) to 100 (high/agree strongly)

0–100

### Practice setting

- I deliver care to a large number of racial/ethnic minority patients in my practice
- I deliver care to a large number of patients with a low-socioeconomic status in my practice

### Attitude

- It is important to me that I practice in a setting that has a racially and ethnically diverse patient population.
- It is important to me that I practice in a setting that has a socioeconomically diverse patient population.
- How important do you feel it is for physicians to consider the patient's culture when providing care?
- Unconscious biases about patients based on their race may affect the way I make decisions about their care without my realizing it.
- "I am culturally sensitive with my patients"

Rate your level of agreement with the following questions from 0 (low/disagree strongly) to 100 (high/agree strongly)

0–100

### Preparedness

- How prepared do you feel to care for patients:
  - From cultures different from your own.
  - With a socioeconomic status different from your own.
  - With health beliefs or practices at odds with Western medicine.
  - With a distrust of the U.S. healthcare system.
  - With limited literacy.
  - Who are members of racial and ethnic minorities.

Rate your level of frequency with the following questions from 0 (low/disagree strongly) to 100 (high/agree strongly)

0–100

### Behavior

- How often do you do the following things when seeing your patients:
    - I ask patients and families to tell me about their own explanations of health and illness.
    - I ask patients and families to tell me about their expectations for care.
    - I recognize potential barriers to service that might be encountered by different people.
    - I act to remove obstacles (e.g., lack of insurance and need for interpreter) for patients of different cultures when I identify such obstacles.
    - I find ways to adapt my services to patients and family cultural preferences.
- 

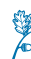

Supplement: Supp_Appendix1.pdf [file Supp_Appendix1.pdf]
