# Supplementary material
Source: PubMed Central journal article supplement (PMC5586003)

### Supplementary Appendix 3. Residency Program Regions Across the United States

---

#### EAST (Mid-Atlantic/New England)

The Mid-Atlantic region: Delaware, Maryland, New Jersey, New York, Pennsylvania, Puerto Rico, and Washington, DC  
New England: Connecticut, Maine, Massachusetts, New Hampshire, Rhode Island, and Vermont

#### MID-WEST (Mid-West)

Illinois, Indiana, Iowa, Kansas, Michigan, Minnesota, Missouri, Nebraska, North Dakota, Ohio, Oklahoma, South Dakota, and Wisconsin

#### SOUTH

Alabama, Arkansas, Florida, Georgia, Kentucky, Louisiana, Mississippi, North Carolina, South Carolina, Tennessee, Texas, Virginia, and West Virginia

#### WEST (California-Hawaii/Mountain West/Northwest)

California-Hawaii

Mountain West: Arizona, Colorado, Nevada, New Mexico, Utah, and Wyoming

Northwest: Alaska, Idaho, Montana, Oregon, and Washington

---

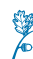

Supplement: Supp_Appendix3.pdf [file Supp_Appendix3.pdf]
